# Supplementary material
Source: PubMed Central journal article supplement (PMC3321599)
Supplement: mt2011305x1.pdf [file mt2011305x1.pdf]

# Supplementary Figure S1.

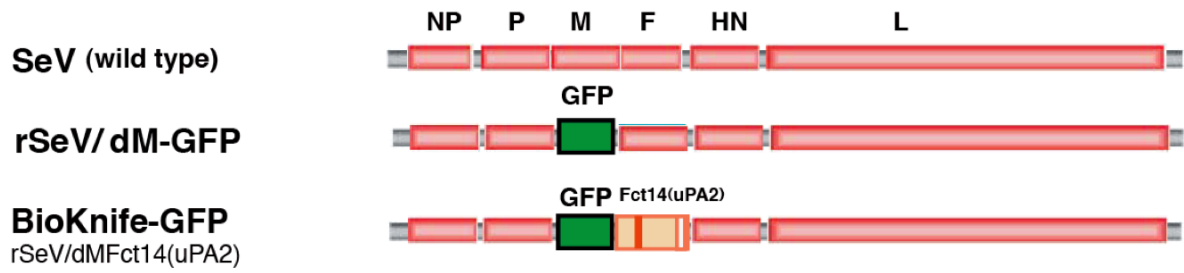

**Supplementary Figure S1:**  
Schematic demonstration of the genome structure of vectors used in this study
